# Supplementary material
Source: PubMed Central journal article supplement (PMC5423504)

Supplemental Figures for:  
Prolonged Temozolomide Maintenance Therapy in Newly Diagnosed Glioblastoma  
Marco Skardelly et al.

**Figure S1: Risk profile and time lines**

This figure provides information on all relevant key parameters of each patient. The first column demonstrates the prognostic relevant covariates: extent of resection (EOR), *MGMT* methylation, age-50 and *IDH* mutation. The second column provides information about 2<sup>nd</sup> line treatments and the third column shows the complete time lines of all applied therapies. Color coding is defined in the figure legend. Abbreviations: RCT = radiochemotherapy, RT = radiotherapy, TMZ = temozolomide, PCV = procarbazine, CCNU (lomustin) and vincristin, Lom = lomustin, Bev = bevacizumab.

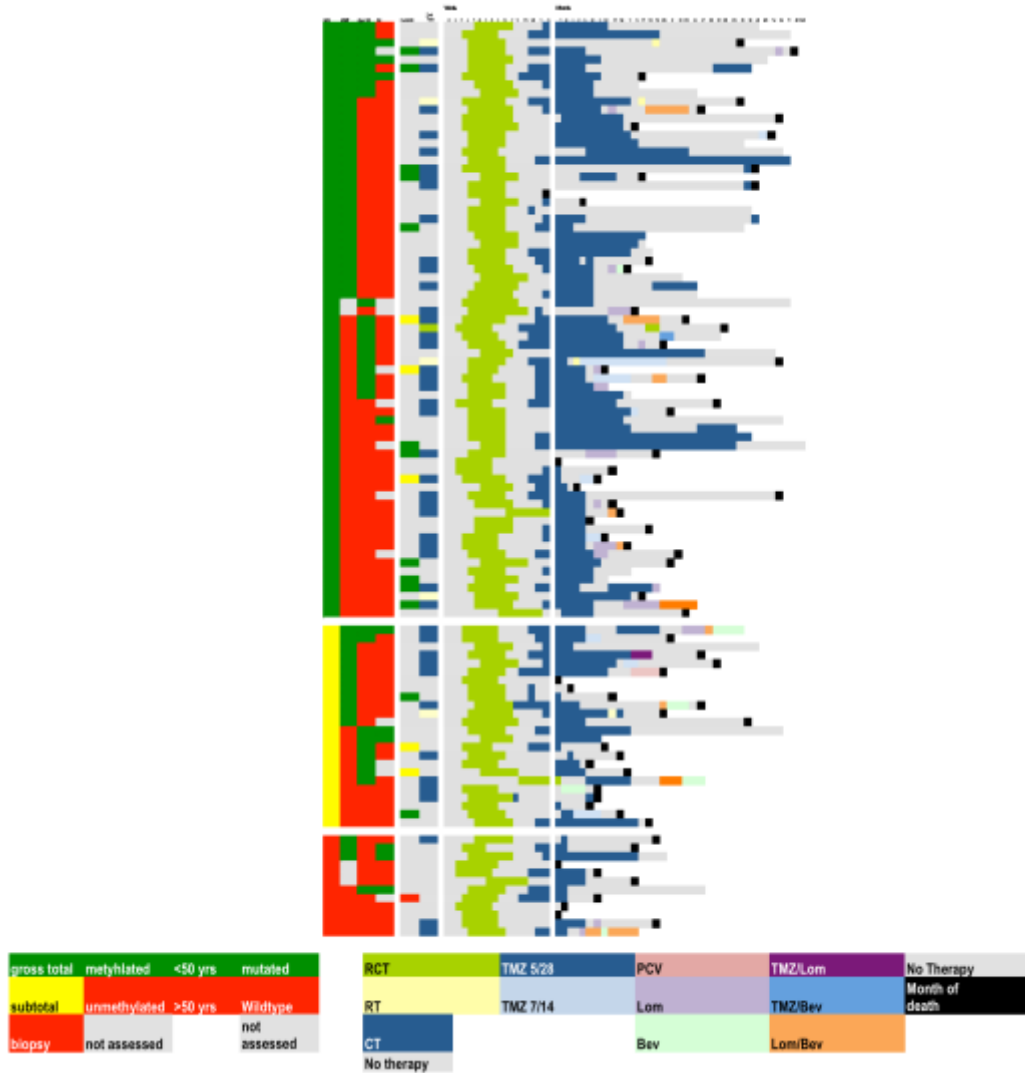

Supplemental Figures for:  
Prolonged Temozolomide Maintenance Therapy in Newly Diagnosed Glioblastoma  
Marco Skardelly et al.

**Figure S2: Adjusted survival curve analyses of OS and PFS**

Adjusted Kaplan Meier plots that demonstrate overall survival and progression-free survival of patients who received exactly 6 cycles of TMZ (group B, dashed line) and patients who received >6 cycles of TMZ (group C, full line).

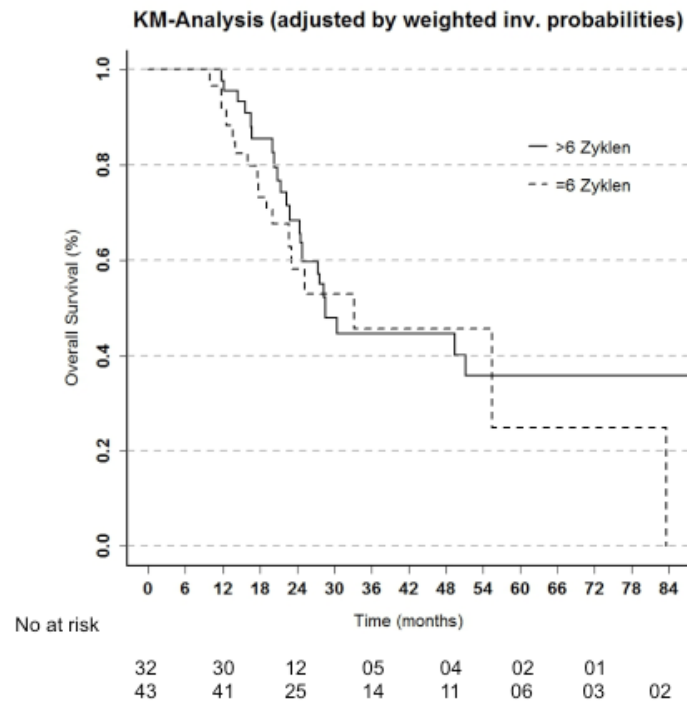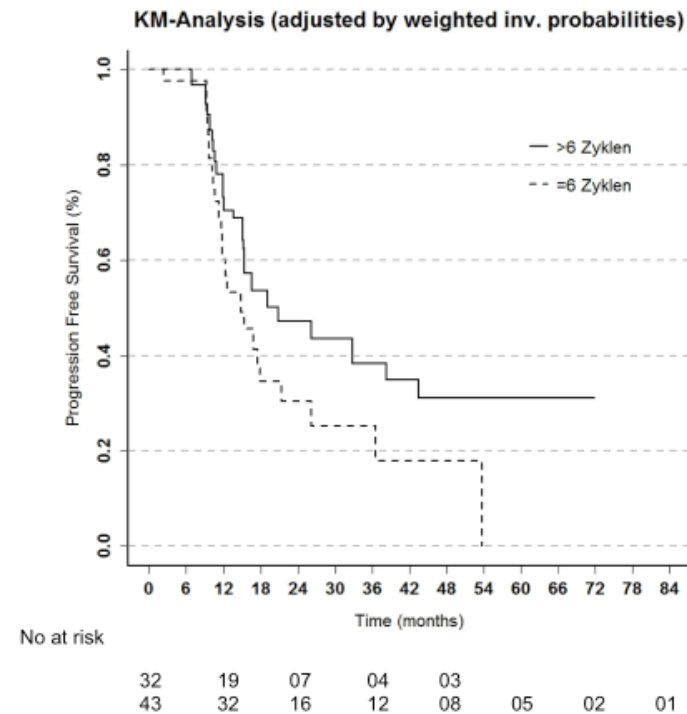

Supplement: supp_the2016-0347_onco12083-sup-0001-s01.pdf [file supp_the2016-0347_onco12083-sup-0001-s01.pdf]
